# Supplementary material for: Mendelian Randomization Reveals Causal Links Between Vertigo Types and structural characteristics of specific brain regions
Source: Research Square preprint supplement (doi:10.21203/rs.3.rs-4963996/v1), 2024-10-17
Supplement: Supplementary file 1 [file 708b91846f837a1c82653d03.docx]

**Additional Figures**

**Figure S1.** MR leave-one-out sensitivity analysis for Gut microbiota on Vertigoes.

**Figure S2.** Scatter plots for the effect of Gut microbiota on Vertigoes.

**Figure S3.** Forest plots for the effect of Gut microbiota on Vertigoes

**Figure S4.** Funnelplot plots for the effect of Gut microbiota on Vertigoes.

**Figure S1.** MR leave-one-out sensitivity analysis for Gut microbiota on Vertigoes.





1. Analysis for "BA-exvivo lh volume BA2" on "BPV"
2. Analysis for "aparc-Desikan rh area rostralmiddlefrontal" on "BPV"
3. Analysis for "IDP dMRI TBSS MD Cingulum hippocampus L" on "BPV"
4. Analysis for "IDP dMRI TBSS L2 Corticospinal tract R" on "BPV"
5. Analysis for "rfMRI connectivity (ICA100 edge 82)" on "BPV"
6. Analysis for "rfMRI connectivity (ICA100 edge 357)" on "BPV"
7. Analysis for "rfMRI connectivity (ICA100 edge 1323)" on "BPV"
8. Analysis for "aparc-a2009s rh volume Pole-occipital" on "PERIPHVERTIGO"
9. Analysis for "IDP dMRI TBSS FA Superior fronto-occipital fasciculus R" on "VERTIGO"
10. Analysis for "rfMRI connectivity (ICA100 edge 184)" on "VERTIGO"
11. Analysis for "rfMRI connectivity (ICA100 edge 236)" on "VERTIGO"
12. Analysis for "rfMRI connectivity (ICA100 edge 1387)" on "VERTIGOCENT"
13. Analysis for "BA-exvivo rh thickness BA4a" on "VERTIGOCENT"
14. Analysis for "aparc-Desikan rh area isthmuscingulate" on "VERTIGOCENT"

**Figure S2.** Scatter plots for the effect of Immune cell on Vertigoes.





1. Analysis for "BA-exvivo lh volume BA2" on "BPV"
2. Analysis for "aparc-Desikan rh area rostralmiddlefrontal" on "BPV"
3. Analysis for "IDP dMRI TBSS MD Cingulum hippocampus L" on "BPV"
4. Analysis for "IDP dMRI TBSS L2 Corticospinal tract R" on "BPV"
5. Analysis for "rfMRI connectivity (ICA100 edge 82)" on "BPV"
6. Analysis for "rfMRI connectivity (ICA100 edge 357)" on "BPV"
7. Analysis for "rfMRI connectivity (ICA100 edge 1323)" on "BPV"
8. Analysis for "aparc-a2009s rh volume Pole-occipital" on "PERIPHVERTIGO"
9. Analysis for "IDP dMRI TBSS FA Superior fronto-occipital fasciculus R" on "VERTIGO"
10. Analysis for "rfMRI connectivity (ICA100 edge 184)" on "VERTIGO"
11. Analysis for "rfMRI connectivity (ICA100 edge 236)" on "VERTIGO"
12. Analysis for "rfMRI connectivity (ICA100 edge 1387)" on "VERTIGOCENT"
13. Analysis for "BA-exvivo rh thickness BA4a" on "VERTIGOCENT"
14. Analysis for "aparc-Desikan rh area isthmuscingulate" on "VERTIGOCENT"

**Figure S3.** Forest plots for the effect of Immune cell on Vertigoes.





1. MR effect size for "BA-exvivo lh volume BA2" on "BPV"
2. MR effect size for "aparc-Desikan rh area rostralmiddlefrontal" on "BPV"
3. MR effect size for "IDP dMRI TBSS MD Cingulum hippocampus L" on "BPV"
4. MR effect size for "IDP dMRI TBSS L2 Corticospinal tract R" on "BPV"
5. MR effect size for "rfMRI connectivity (ICA100 edge 82)" on "BPV"
6. MR effect size for "rfMRI connectivity (ICA100 edge 357)" on "BPV"
7. MR effect size for "rfMRI connectivity (ICA100 edge 1323)" on "BPV"
8. MR effect size for "aparc-a2009s rh volume Pole-occipital" on "PERIPHVERTIGO"
9. MR effect size for "IDP dMRI TBSS FA Superior fronto-occipital fasciculus R" on "VERTIGO"
10. MR effect size for "rfMRI connectivity (ICA100 edge 184)" on "VERTIGO"
11. MR effect size for "rfMRI connectivity (ICA100 edge 236)" on "VERTIGO"
12. MR effect size for "rfMRI connectivity (ICA100 edge 1387)" on "VERTIGOCENT"
13. MR effect size for "BA-exvivo rh thickness BA4a" on "VERTIGOCENT"
14. MR effect size for "aparc-Desikan rh area isthmuscingulate" on "VERTIGOCENT"

**Figure S4.** Funnelplotplots for the effect of Immune cell on Vertigoes.
