# Supplementary material for: Mendelian Randomization Reveals Causal Links Between Vertigo Types and structural characteristics of specific brain regions
Source: Research Square preprint supplement (doi:10.21203/rs.3.rs-4963996/v1), 2024-10-17
Supplement: Supplementary file 2 [file 9393841bad933973e8156e60.xlsx]

## Sheet: Sheet1
outcome	exposure ID	exposure	method	nsnp	b	se	pval	lo_ci	up_ci	or	or_lci95	or_uci95
BPV	GCST90002836	BA-exvivo lh volume BA2	MR Egger	37	-0.236065	0.136908	0.0934839	-0.504404	0.0322745	0.78973	0.603866	1.0328
			Weighted median	37	-0.168797	0.0768894	0.0281403	-0.3195	-0.0180939	0.84468	0.726512	0.982069
			Inverse variance weighted	37	-0.173599	0.0518427	0.000812304	-0.275211	-0.0719871	0.840634	0.759412	0.930543
			Simple mode	37	-0.184427	0.138765	0.192191	-0.456408	0.0875529	0.83158	0.633556	1.0915
			Weighted mode	37	-0.207488	0.115268	0.0802385	-0.433413	0.0184379	0.812623	0.648292	1.01861
	GCST90003133	aparc-Desikan rh area rostralmiddlefrontal	MR Egger	34	-0.150127	0.150382	0.325623	-0.444876	0.144623	0.860599	0.640904	1.1556
			Weighted median	34	-0.185115	0.0818563	0.0237303	-0.345554	-0.0246771	0.831008	0.707828	0.975625
			Inverse variance weighted	34	-0.196125	0.0567176	0.000544362	-0.307291	-0.0849584	0.82191	0.735436	0.91855
			Simple mode	34	-0.35641	0.175035	0.0498195	-0.69948	-0.0133407	0.700185	0.496844	0.986748
			Weighted mode	34	-0.297999	0.153954	0.0615192	-0.599749	0.00375156	0.742302	0.548949	1.00376
	GCST90004064	IDP dMRI TBSS MD Cingulum hippocampus L	MR Egger	59	0.17605	0.0806893	0.0332603	0.0178988	0.334201	1.1925	1.01806	1.39682
			Weighted median	59	0.131125	0.0566043	0.02053	0.0201805	0.242069	1.14011	1.02039	1.27388
			Inverse variance weighted	59	0.121375	0.0364741	0.00087563	0.0498859	0.192864	1.12905	1.05115	1.21272
			Simple mode	59	0.101394	0.115095	0.381978	-0.124193	0.326981	1.10671	0.883209	1.38678
			Weighted mode	59	0.129082	0.0716611	0.0768564	-0.0113735	0.269538	1.13778	0.988691	1.30936
	GCST90004129	IDP dMRI TBSS L2 Corticospinal tract R	MR Egger	35	-0.227311	0.133048	0.0969381	-0.488085	0.0334639	0.796673	0.613801	1.03403
			Weighted median	35	-0.130776	0.0771298	0.0899752	-0.28195	0.0203986	0.877414	0.754311	1.02061
			Inverse variance weighted	35	-0.173512	0.0524238	0.000933615	-0.276263	-0.0707618	0.840707	0.758613	0.931684
			Simple mode	35	-0.0851308	0.140749	0.549299	-0.360998	0.190736	0.918392	0.69698	1.21014
			Weighted mode	35	-0.0891962	0.116182	0.447947	-0.316912	0.13852	0.914666	0.728395	1.14857
	GCST90004935	rfMRI connectivity (ICA100 edge 82)	MR Egger	14	0.185468	0.21081	0.39625	-0.227718	0.598655	1.20378	0.796348	1.81967
			Weighted median	14	0.366439	0.134476	0.00643149	0.102865	0.630013	1.44259	1.10834	1.87763
			Inverse variance weighted	14	0.40352	0.0953492	2.32e-05	0.216635	0.590404	1.49708	1.24189	1.80472
			Simple mode	14	0.344036	0.20655	0.119687	-0.0608019	0.748874	1.41063	0.94101	2.11462
			Weighted mode	14	0.351904	0.209037	0.116133	-0.057809	0.761617	1.42177	0.94383	2.14174
	GCST90005210	rfMRI connectivity (ICA100 edge 357)	MR Egger	26	0.112736	0.12772	0.386164	-0.137595	0.363067	1.11934	0.871451	1.43773
			Weighted median	26	0.152398	0.0853905	0.0743062	-0.0149669	0.319764	1.16462	0.985145	1.3768
			Inverse variance weighted	26	0.195426	0.0593454	0.000991172	0.0791086	0.311742	1.21583	1.08232	1.3658
			Simple mode	26	0.161755	0.135744	0.2446	-0.104303	0.427813	1.17557	0.900952	1.5339
			Weighted mode	26	0.145089	0.108894	0.19475	-0.0683429	0.358522	1.15614	0.93394	1.43121
	GCST90006176	rfMRI connectivity (ICA100 edge 1323)	MR Egger	23	-0.264878	0.172168	0.138862	-0.602326	0.0725709	0.7673	0.547536	1.07527
			Weighted median	23	-0.196136	0.0916994	0.0324433	-0.375867	-0.0164056	0.8219	0.686693	0.983728
			Inverse variance weighted	23	-0.240819	0.065197	0.000221002	-0.368605	-0.113033	0.785984	0.691698	0.893121
			Simple mode	23	-0.178633	0.161583	0.280879	-0.495335	0.13807	0.836413	0.609367	1.14806
			Weighted mode	23	-0.147872	0.160014	0.365449	-0.4615	0.165755	0.862541	0.630338	1.18028
PERIPHVERTIGO	GCST90003040	aparc-a2009s rh volume Pole-occipital	MR Egger	50	0.429603	0.216311	0.052756	0.00563228	0.853573	1.53665	1.00565	2.34802
			Weighted median	50	0.252149	0.124607	0.0430161	0.00791922	0.49638	1.28679	1.00795	1.64276
			Inverse variance weighted	50	0.286374	0.0830587	0.000565058	0.123579	0.44917	1.33159	1.13154	1.56701
			Simple mode	50	0.321644	0.279411	0.255256	-0.226001	0.86929	1.37939	0.797717	2.38522
			Weighted mode	50	0.228457	0.249622	0.364562	-0.260801	0.717716	1.25666	0.770434	2.04975
VERTIGO	GCST90003919	IDP dMRI TBSS FA Superior fronto-occipital fasciculus R	MR Egger	43	0.237155	0.12138	0.0575681	-0.000750395	0.47506	1.26764	0.99925	1.60811
			Weighted median	43	0.138673	0.0555758	0.0125885	0.0297444	0.247602	1.14875	1.03019	1.28095
			Inverse variance weighted	43	0.14519	0.0402986	0.000314737	0.0662048	0.224175	1.15626	1.06845	1.25129
			Simple mode	43	0.070733	0.118426	0.553529	-0.161382	0.302848	1.07329	0.850967	1.35371
			Weighted mode	43	0.105575	0.101557	0.304492	-0.0934774	0.304627	1.11135	0.910759	1.35612
	GCST90005037	rfMRI connectivity (ICA100 edge 184)	MR Egger	19	-0.0572204	0.101812	0.581439	-0.256773	0.142332	0.944386	0.773544	1.15296
			Weighted median	19	-0.135041	0.0750966	0.0721405	-0.28223	0.0121484	0.87368	0.7541	1.01222
			Inverse variance weighted	19	-0.168969	0.0513161	0.000992278	-0.269548	-0.0683893	0.844535	0.763724	0.933897
			Simple mode	19	-0.182391	0.112176	0.121341	-0.402256	0.0374727	0.833275	0.66881	1.03818
			Weighted mode	19	-0.140092	0.0851339	0.117205	-0.306955	0.0267703	0.869278	0.735684	1.02713
	GCST90005089	rfMRI connectivity (ICA100 edge 236)	MR Egger	12	0.175625	0.136927	0.228559	-0.0927525	0.444002	1.19199	0.911419	1.55893
			Weighted median	12	0.264163	0.110872	0.0171916	0.0468528	0.481472	1.30234	1.04797	1.61846
			Inverse variance weighted	12	0.28114	0.076722	0.000247923	0.130765	0.431515	1.32464	1.1397	1.53959
			Simple mode	12	0.306673	0.191432	0.137461	-0.068534	0.68188	1.3589	0.933762	1.97759
			Weighted mode	12	0.334636	0.184003	0.0962691	-0.0260094	0.695281	1.39743	0.974326	2.00427
VERTIGOCENT	GCST90006240	rfMRI connectivity (ICA100 edge 1387)	MR Egger	20	-1.37143	1.08171	0.221013	-3.49159	0.748728	0.253743	0.0304524	2.11431
			Weighted median	20	-1.05554	0.506895	0.0373102	-2.04905	-0.0620206	0.348006	0.128857	0.939864
			Inverse variance weighted	20	-1.22661	0.368178	0.000863575	-1.94824	-0.504982	0.293285	0.142525	0.603517
			Simple mode	20	-0.931402	0.825308	0.273136	-2.54901	0.686201	0.394001	0.0781593	1.98616
			Weighted mode	20	-0.888174	0.791565	0.275822	-2.43964	0.663293	0.411406	0.0871922	1.94117
	GCST90003531	BA-exvivo rh thickness BA4a	MR Egger	36	-0.708137	0.526017	0.187137	-1.73913	0.322856	0.492561	0.175673	1.38107
			Weighted median	36	-0.80361	0.344003	0.0194883	-1.47786	-0.129365	0.44771	0.228126	0.878654
			Inverse variance weighted	36	-0.882766	0.236003	0.000183663	-1.34533	-0.4202	0.413637	0.260453	0.656915
			Simple mode	36	-0.253338	0.701165	0.72004	-1.62762	1.12095	0.776206	0.196396	3.06775
			Weighted mode	36	-0.882059	0.565249	0.127644	-1.98995	0.225828	0.41393	0.136703	1.25336
	GCST90003116	aparc-Desikan rh area isthmuscingulate	MR Egger	35	0.723857	0.934579	0.444133	-1.10792	2.55563	2.06237	0.330246	12.8794
			Weighted median	35	1.08503	0.363185	0.00281247	0.373182	1.79687	2.95951	1.45235	6.03073
			Inverse variance weighted	35	0.898526	0.26971	0.00086393	0.369895	1.42716	2.45598	1.44758	4.16684
			Simple mode	35	1.55878	0.702622	0.0332999	0.181643	2.93592	4.75303	1.19919	18.8389
			Weighted mode	35	1.48797	0.654991	0.0295469	0.204191	2.77176	4.42811	1.22653	15.9867
