# Supplementary material for: Mendelian Randomization Reveals Causal Links Between Vertigo Types and structural characteristics of specific brain regions
Source: Research Square preprint supplement (doi:10.21203/rs.3.rs-4963996/v1), 2024-10-17
Supplement: Supplementary file 3 [file b1ddc7396691abdf161f309a.xlsx]

## Sheet: AD
Table S2. Mendelian randomization Sensitivity analysis of VERTIGO
Abbreviation: standard error (SE); Inverse variance weighted (IVW)
Exposure	Outcome	Pleiotropy test			Heterogeneity test			MR-PRESSO
		Intercept	SE	P-value	Method	Cochran’s Q statistic	P-value	Global Test	P-value
BA-exvivo lh volume BA2	BPV	0.00452254	0.00917401	0.625111	Inverse variance weighted	28.4457	0.810942	29.8843	0.837
aparc-Desikan rh area rostralmiddlefrontal	BPV	-0.00326019	0.0098487	0.742781	Inverse variance weighted	34.6636	0.388485	36.8333	0.413
IDP dMRI TBSS MD Cingulum hippocampus L	BPV	-0.00416451	0.00548225	0.450603	Inverse variance weighted	52.3129	0.685767	53.7744	0.715
IDP dMRI TBSS L2 Corticospinal tract R	BPV	0.00398335	0.00905427	0.662847	Inverse variance weighted	30.6112	0.634507	32.4679	0.656
rfMRI connectivity (ICA100 edge 82)	BPV	0.0186146	0.0160504	0.268702	Inverse variance weighted	8.83181	0.785524	10.2751	0.792
rfMRI connectivity (ICA100 edge 357)	BPV	0.00869249	0.0118888	0.471767	Inverse variance weighted	16.5421	0.897726	17.7702	0.904
rfMRI connectivity (ICA100 edge 1323)	BPV	0.00178363	0.0118134	0.88143	Inverse variance weighted	19.4878	0.615046	21.1938	0.653
aparc-a2009s rh volume Pole-occipital	PERIPHVERTIGO	-0.0103107	0.0143657	0.476401	Inverse variance weighted	50.0536	0.43134	52.2771	0.459
IDP dMRI TBSS FA Superior fronto-occipital fasciculus R	VERTIGO	-0.00574057	0.00714319	0.426238	Inverse variance weighted	51.4914	0.149626	53.8899	0.198
rfMRI connectivity (ICA100 edge 184)	VERTIGO	-0.0115337	0.00907577	0.220908	Inverse variance weighted	7.91386	0.979891	8.81711	0.985
rfMRI connectivity (ICA100 edge 236)	VERTIGO	0.0107994	0.0116079	0.374104	Inverse variance weighted	10.2233	0.510422	12.3624	0.563
rfMRI connectivity (ICA100 edge 1387)	VERTIGOCENT	0.0104842	0.0536385	0.846231	Inverse variance weighted	37.4174	0.315045	39.5129	0.32
BA-exvivo rh thickness BA4a	VERTIGOCENT	-0.0137107	0.0369092	0.712592	Inverse variance weighted	26.4825	0.849258	27.9536	0.876
aparc-Desikan rh area isthmuscingulate	VERTIGOCENT	0.00944769	0.0663544	0.88836	Inverse variance weighted	14.5381	0.751469	15.959	0.764

## Sheet: FTD
Supplementary Table S7. Mendelian randomization Sensitivity analysis of FTD
Exposure	Outcome	Pleiotropy test			Heterogeneity test			MR-PRESSO
		Intercept	SE	P-value	Method	Cochran’s Q statistic	P-value	Global Test	P-value
Gut microbiota abundance (class Melainabacteria id.1589)	FTD	-0.206	0.1742	0.271	IVW	7.6367	0.5711	9.676	0.581
Gut microbiota abundance (family Rhodospirillaceae id.2717)	FTD	-0.1429	0.245	0.5706	IVW	17.0982	0.1949	20.053	0.234
Gut microbiota abundance (genus Desulfovibrio id.3173)	FTD	0.1732	0.2135	0.4439	IVW	7.4906	0.4847	9.126	0.525
Gut microbiota abundance (genus Eubacterium fissicatena group id.14373)	FTD	-0.2843	0.316	0.3981	IVW	4.4427	0.8151	5.44	0.835
Gut microbiota abundance (genus Phascolarctobacterium id.2168)	FTD	0.1251	0.3826	0.7569	IVW	6.5907	0.3604	9.509	0.393
Gut microbiota abundance (unknown genus id.2041)	FTD	0.154	0.1735	0.3957	IVW	11.3521	0.4143	13.435	0.437
Gut microbiota abundance (unknown genus id.826)	FTD	-0.1273	0.1672	0.4623	IVW	2.538	0.998	3.099	0.999
Gut microbiota abundance (order Rhodospirillales id.2667)	FTD	-0.1255	0.2446	0.6179	IVW	16.5644	0.1667	19.575	0.192
Tumor necrosis factor-alpha (TNF-α)	FTD	-0.0933	0.1993	0.6856	IVW	3.0275	0.3874	6.619	0.396
Interleukin-16 (IL-16)	FTD	-0.0941	0.1322	0.4968	IVW	6.4178	0.6975	7.394	0.746

## Sheet: DLB
Supplementary Table S7. Mendelian randomization Sensitivity analysis of DLB
Exposure	Outcome	Pleiotropy test			Heterogeneity test			MR-PRESSO
		Intercept	SE	P-value	Method	Cochran’s Q statistic	P-value	Global Test	P-value
Gut microbiota abundance (class Alphaproteobacteria id.2379)	DLB	0.0018	0.0699	0.9809	IVW	1.4262	0.9642	1.956	0.972
Gut microbiota abundance (genus Bifidobacterium id.436)	DLB	-0.0068	0.0895	0.9414	IVW	10.934	0.2055	13.523	0.23
Gut microbiota abundance (genus Flavonifractor id.2059)	DLB	-0.0363	0.0804	0.6826	IVW	2.9204	0.5712	4.514	0.62
Gut microbiota abundance (genus Lachnospiraceae UCG001 id.11321)	DLB	0.0164	0.0629	0.7992	IVW	4.5432	0.9513	5.364	0.958
Gut microbiota abundance (genus Ruminococcus gnavus group id.14376)	DLB	0.0471	0.0605	0.4561	IVW	5.3667	0.8654	6.536	0.876
Gut microbiota abundance (genus Victivallis id.2256)	DLB	-0.0079	0.0976	0.9378	IVW	2.3665	0.9843	6.021	0.806
Gut microbiota abundance (order Bacillales id.1674)	DLB	0.015	0.072	0.8409	IVW	4.7942	0.7793	6.021	0.812
Gut microbiota abundance (phylum Cyanobacteria id.1500)	DLB	-0.0524	0.0689	0.5026	IVW	1.0342	0.9046	1.581	0.931
Macrophage migration inhibitory factor (MIF)	DLB	0.0651	0.0563	0.3119	IVW	5.5643	0.3509	8.01	0.403

## Sheet: VD
Supplementary Table S7. Mendelian randomization Sensitivity analysis of VD
Exposure	Outcome	Pleiotropy test			Heterogeneity test			MR-PRESSO
		Intercept	SE	P-value	Method	Cochran’s Q statistic	P-value	Global Test	P-value
Gut microbiota abundance (genus Eubacterium nodatum group id.11297)	VD	0.0121	0.0566	0.8356	IVW	9.2176	0.5116	11.054	0.541
Gut microbiota abundance (genus Prevotella9 id.11183)	VD	-0.0056	0.0333	0.8686	IVW	11.4333	0.6517	12.835	0.679
Gut microbiota abundance (genus Ruminococcus gauvreauii group id.11342)	VD	-0.0384	0.0491	0.4543	IVW	7.5223	0.6754	9.1	0.675
Gut microbiota abundance (genus Slackia id.825)	VD	-0.1224	0.1048	0.3079	IVW	4.8577	0.4335	6.725	0.489
Gut microbiota abundance (genus Veillonella id.2198)	VD	-0.1008	0.3553	0.7951	IVW	1.3445	0.8538	2.153	0.854
Gut microbiota abundance (phylum Lentisphaerae id.2238)	VD	0.0292	0.0687	0.6833	IVW	9.1472	0.33	11.727	0.32
Basic fibroblast growth factor (FGFBasic)	VD	0.0478	0.0687	0.5364	IVW	3.2328	0.5196	4.9126	0.607

## Sheet: PDD
Supplementary Table S7. Mendelian randomization Sensitivity analysis of PDD
Exposure	Outcome	Pleiotropy test			Heterogeneity test			MR-PRESSO
		Intercept	SE	P-value	Method	Cochran’s Q statistic	P-value	Global Test	P-value
Gut microbiota abundance (class Erysipelotrichia id.2147)	PDD	0.1039	0.1009	0.3253	IVW	12.089	0.439	14.049	0.48
Gut microbiota abundance (class Lentisphaeria id.2250)	PDD	0.018	0.1659	0.9171	IVW	10.643	0.155	13.791	0.207
Gut microbiota abundance (family Erysipelotrichaceae id.2149)	PDD	0.1039	0.1009	0.3253	IVW	12.089	0.439	14.049	0.483
Gut microbiota abundance (genus Lachnoclostridium id.11308)	PDD	0.0372	0.0838	0.6661	IVW	11.524	0.485	13.316	0.55
Gut microbiota abundance (genus Romboutsia id.11347)	PDD	0.0056	0.0783	0.9446	IVW	8.578	0.738	10.14	0.762
Gut microbiota abundance (genus Roseburia id.2012)	PDD	0.045	0.0803	0.5863	IVW	7.836	0.798	8.892	0.817
Gut microbiota abundance (order Erysipelotrichales id.2148)	PDD	0.1039	0.1009	0.3253	IVW	12.089	0.439	14.049	0.463
Gut microbiota abundance (order Victivallales id.2254)	PDD	0.018	0.1659	0.9171	IVW	10.643	0.155	13.791	0.218
Gut microbiota abundance (phylum Lentisphaerae id.2238)	PDD	0.0157	0.1571	0.9233	IVW	10.739	0.217	13.568	0.272
Platelet derived growth factor BB (PDGFbb)	PDD	-0.0761	0.0479	0.1407	IVW	10.098	0.607	12.66	0.617
Monokine induced by interferon-gamma (MIG)	PDD	0.0183	0.0748	0.811	IVW	10.705	0.635	12.268	0.678
Interleukin-17 (IL-17)	PDD	-0.1053	0.0809	0.2293	IVW	11.416	0.248	13.837	0.294
