# Supplementary material for: Mendelian Randomization Reveals Causal Links Between Vertigo Types and structural characteristics of specific brain regions
Source: Research Square preprint supplement (doi:10.21203/rs.3.rs-4963996/v1), 2024-10-17
Supplement: Supplementary file 4 [file fa44ae13e069059fa28d0d1d.xlsx]

## Sheet: Sheet1
Table S1.The SNP of MR on BPV
SNP	effect_allele.exposure	other_allele.exposure	effect_allele.outcome	other_allele.outcome	beta.exposure	beta.outcome	eaf.outcome	pval.outcome	se.outcome	se.exposure	pval.exposure	samplesize.exposure	R2	f	meanf
rs10891091	T	C	T	C	0.086578	-0.024294	0.084447	0.36956	0.0270746	0.018475	2.79834e-06	21281	0.00103088	21.9586	23.6507
rs11162212	A	C	A	C	-0.045108	-0.0172102	0.524895	0.256087	0.015154	0.0099343	5.63897e-06	21281	0.000967877	20.6154	23.6507
rs112527462	C	G	C	G	-0.10115	0.0461454	0.0335321	0.27554	0.04232	0.022183	5.15229e-06	21281	0.000976057	20.7898	23.6507
rs1135527	T	C	T	C	0.19289	0.084041	0.00507558	0.434983	0.107649	0.040698	2.15675e-06	21281	0.00105444	22.4612	23.6507
rs115151383	G	C	G	C	0.15799	-0.0201053	0.0486023	0.564682	0.0349111	0.034773	5.56288e-06	21281	0.000969085	20.6412	23.6507
rs117954898	C	A	C	A	0.16527	0.119361	0.00509177	0.260636	0.106109	0.036209	5.03501e-06	21281	0.000977998	20.8312	23.6507
rs12162135	G	T	G	T	-0.051523	-0.00837489	0.55538	0.581393	0.0151897	0.0097137	1.14288e-07	21281	0.00132028	28.1314	23.6507
rs12319650	C	A	C	A	-0.060752	-0.000232509	0.0980524	0.9927	0.0254114	0.01371	9.4189e-06	21281	0.000921836	19.6338	23.6507
rs12650148	A	C	A	C	0.043933	-0.00245552	0.398435	0.874014	0.0154863	0.0098917	8.98049e-06	21281	0.000926073	19.7242	23.6507
rs16938003	A	G	A	G	0.12088	-0.016222	0.0390681	0.678671	0.0391573	0.02676	6.30086e-06	21281	0.000957918	20.4031	23.6507
rs17425245	T	G	T	G	-0.053604	0.0229859	0.208186	0.216143	0.0185842	0.011321	2.20445e-06	21281	0.00105239	22.4173	23.6507
rs1764977	C	T	C	T	-0.045116	-0.00789016	0.623585	0.61451	0.0156661	0.010012	6.63285e-06	21281	0.000953264	20.3039	23.6507
rs181397378	G	A	G	A	-0.1653	0.0596079	0.0569952	0.0702635	0.0329287	0.037155	8.66962e-06	21281	0.000929213	19.7911	23.6507
rs1838964	T	C	T	C	-0.045242	0.0209761	0.469087	0.1644	0.0150861	0.0099282	5.22035e-06	21281	0.000974826	20.7636	23.6507
rs1858976	G	A	G	A	-0.046165	0.0271167	0.335856	0.0907925	0.0160337	0.010363	8.44112e-06	21281	0.000931661	19.8433	23.6507
rs199943227	ACAGT	A	ACAGT	A	0.1323	-0.0716078	0.0195483	0.185269	0.0540557	0.026076	3.93822e-07	21281	0.00120815	25.7393	23.6507
rs2121840	C	T	C	T	-0.046128	0.0267624	0.530062	0.0771312	0.0151407	0.010021	4.18794e-06	21281	0.000994679	21.1868	23.6507
rs2210562	G	A	G	A	-0.079504	0.0168997	0.128995	0.456861	0.0227139	0.014908	9.76787e-08	21281	0.00133465	28.438	23.6507
rs2279829	T	C	T	C	-0.10338	0.0306529	0.289254	0.0656266	0.0166505	0.01167	8.6896e-19	21281	0.00367401	78.4676	23.6507
rs2326251	G	T	G	T	0.046973	-0.0350027	0.234929	0.0484853	0.01774	0.010628	9.93802e-06	21281	0.000917071	19.5323	23.6507
rs2349128	T	C	T	C	0.057628	-0.00511939	0.808191	0.788947	0.0191252	0.012136	2.06063e-06	21281	0.00105843	22.5463	23.6507
rs2577128	C	T	C	T	0.075055	0.0145946	0.864269	0.512224	0.0222689	0.016957	9.63829e-06	21281	0.00091975	19.5894	23.6507
rs527392	T	C	T	C	-0.055991	0.0220624	0.858099	0.309304	0.0217004	0.011565	1.29718e-06	21281	0.00110021	23.4371	23.6507
rs55763851	T	C	T	C	0.05834	-0.0052318	0.20422	0.780538	0.0187776	0.013046	7.7983e-06	21281	0.000938811	19.9957	23.6507
rs57119949	T	G	T	G	0.07047	-0.0128648	0.155583	0.541796	0.0210864	0.014301	8.38494e-07	21281	0.00113969	24.2792	23.6507
rs61897789	A	G	A	G	0.13185	-0.0149798	0.0438613	0.683636	0.0367597	0.026795	8.67961e-07	21281	0.00113649	24.211	23.6507
rs62025996	G	A	G	A	-0.075414	0.0396562	0.0741403	0.168346	0.0287878	0.016859	7.74283e-06	21281	0.000939377	20.0078	23.6507
rs6994428	G	A	G	A	0.066155	-0.00768787	0.813581	0.691073	0.0193454	0.014325	3.89314e-06	21281	0.00100117	21.3253	23.6507
rs72853046	C	G	C	G	-0.051413	-0.0100511	0.260143	0.558694	0.0171878	0.011563	8.78416e-06	21281	0.000928132	19.7681	23.6507
rs73030276	T	C	T	C	-0.069797	0.00956876	0.192012	0.61851	0.0192158	0.011064	2.87674e-10	21281	0.00186658	39.7932	23.6507
rs73214949	C	G	C	G	0.088149	0.034343	0.0621397	0.274364	0.0314189	0.019874	9.23422e-06	21281	0.000923572	19.6709	23.6507
rs75248783	A	G	A	G	0.051195	-0.0273884	0.180932	0.162802	0.0196233	0.011294	5.84521e-06	21281	0.000964602	20.5456	23.6507
rs76041891	C	G	C	G	0.15305	-0.0425607	0.0257148	0.374512	0.0479258	0.032213	2.03517e-06	21281	0.00105962	22.5717	23.6507
rs76844376	T	A	T	A	-0.18914	0.0871093	0.00725629	0.33549	0.0904452	0.04049	3.01231e-06	21281	0.00102432	21.8188	23.6507
rs77164466	A	T	A	T	-0.048456	-0.0174096	0.276049	0.301944	0.0168653	0.010282	2.45754e-06	21281	0.00104255	22.2075	23.6507
rs9353816	A	G	A	G	0.06073	-0.00297332	0.142151	0.890268	0.0215514	0.012962	2.8119e-06	21281	0.00103044	21.9494	23.6507
rs9459971	A	G	A	G	-0.051108	0.0113674	0.799437	0.549268	0.0189818	0.011518	9.16431e-06	21281	0.000924336	19.6871	23.6507
rs10264709	G	C	G	C	0.056486	0.00595095	0.828415	0.766397	0.0200308	0.011725	1.46487e-06	21282	0.00108936	23.2068	23.1749
rs10283100	G	A	G	A	-0.097889	-0.0334139	0.92555	0.250229	0.0290609	0.021193	3.87882e-06	21282	0.00100146	21.3325	23.1749
rs10509336	T	C	T	C	-0.093948	0.0417345	0.0340212	0.314267	0.0414729	0.018748	5.45884e-07	21282	0.00117853	25.1087	23.1749
rs10902101	T	C	T	C	-0.05942	0.0210632	0.826953	0.292104	0.0199932	0.012767	3.27039e-06	21282	0.00101679	21.6594	23.1749
rs11065394	G	A	G	A	0.053624	-0.0236061	0.246906	0.177968	0.0175244	0.011841	5.97035e-06	21282	0.000962744	20.5069	23.1749
rs11117786	T	C	T	C	-0.048267	0.00209818	0.425633	0.890594	0.0152537	0.010177	2.12031e-06	21282	0.00105582	22.4916	23.1749
rs116655974	T	C	T	C	0.14356	-0.0264157	0.0692552	0.378362	0.0299865	0.031899	6.81397e-06	21282	0.000950796	20.2522	23.1749
rs11721353	T	C	T	C	0.046306	-0.0412125	0.716889	0.0139634	0.0167653	0.010415	8.7963e-06	21282	0.000927984	19.7658	23.1749
rs12827748	C	T	C	T	0.058286	-0.0214749	0.746266	0.2158	0.0173496	0.010566	3.49784e-08	21282	0.00142782	30.4275	23.1749
rs1322915	G	A	G	A	0.058856	-0.0245638	0.194634	0.196304	0.01901	0.012587	2.94578e-06	21282	0.00102631	21.8623	23.1749
rs13264707	C	T	C	T	0.050823	0.00397118	0.294937	0.809694	0.0164902	0.010026	4.02532e-07	21282	0.00120595	25.6936	23.1749
rs140414607	T	C	T	C	0.087776	-0.0452957	0.0414355	0.229041	0.0376576	0.018943	3.61493e-06	21282	0.00100787	21.4691	23.1749
rs141742577	C	G	C	G	-0.073597	0.00833457	0.102068	0.737471	0.0248642	0.015024	9.71628e-07	21282	0.00112628	23.9943	23.1749
rs149001409	A	G	A	G	-0.1735	-0.0159253	0.0197948	0.769086	0.0542471	0.03622	1.67803e-06	21282	0.00107701	22.9436	23.1749
rs1530760	T	C	T	C	-0.087733	-0.00544753	0.0729935	0.851032	0.0290068	0.017357	4.3481e-07	21282	0.00119907	25.5468	23.1749
rs2529180	A	C	A	C	-0.059047	0.0458297	0.171413	0.021707	0.0199654	0.012197	1.30107e-06	21282	0.00110002	23.4341	23.1749
rs34612536	C	A	C	A	-0.083549	0.0292292	0.901809	0.248022	0.025303	0.016537	4.40555e-07	21282	0.00119794	25.5228	23.1749
rs34889108	A	G	A	G	-0.050019	-0.0297638	0.536606	0.0494117	0.0151468	0.0099654	5.22878e-07	21282	0.00118237	25.1907	23.1749
rs4075815	C	T	C	T	0.044506	-0.0109428	0.670225	0.49881	0.0161789	0.0098999	6.97429e-06	21282	0.000948748	20.2085	23.1749
rs4924346	A	G	A	G	-0.091687	-0.00215002	0.0977238	0.932281	0.0253018	0.017089	8.16018e-08	21282	0.00135077	28.7834	23.1749
rs56398849	G	T	G	T	0.05852	-0.0180132	0.211804	0.330084	0.0184952	0.013121	8.23379e-06	21282	0.000933806	19.89	23.1749
rs59709721	A	G	A	G	-0.15934	0.0636765	0.00667166	0.494864	0.0932862	0.033866	2.55447e-06	21282	0.0010391	22.1351	23.1749
rs6573188	G	C	G	C	-0.044099	0.00171272	0.401387	0.91134	0.0153816	0.0097675	6.36942e-06	21282	0.000956891	20.3821	23.1749
rs6574929	C	T	C	T	0.12643	-0.0157667	0.975316	0.745065	0.04849	0.022513	1.98016e-08	21282	0.00147971	31.535	23.1749
rs6658691	C	G	C	G	0.055463	-0.0239266	0.704189	0.148491	0.0165596	0.010069	3.66269e-08	21282	0.00142365	30.3384	23.1749
rs72789426	C	G	C	G	-0.10679	0.0243964	0.0503363	0.481086	0.0346267	0.022971	3.35583e-06	21282	0.00101449	21.6103	23.1749
rs72839962	T	C	T	C	0.22035	0.0110734	0.0217914	0.8321	0.0522307	0.043927	5.31374e-07	21282	0.00118097	25.1607	23.1749
rs7319732	G	T	G	T	0.047169	-0.0395025	0.674091	0.0142669	0.0161203	0.010547	7.77678e-06	21282	0.000938934	19.9993	23.1749
rs73592883	A	G	A	G	0.057176	0.00915991	0.190407	0.633426	0.0192068	0.012285	3.27265e-06	21282	0.00101677	21.6589	23.1749
rs7846499	C	T	C	T	0.046276	0.00704195	0.324123	0.663063	0.0161628	0.0099193	3.1017e-06	21282	0.00102163	21.7625	23.1749
rs79402609	T	G	T	G	-0.066056	0.0268546	0.130819	0.232362	0.0224857	0.013553	1.10255e-06	21282	0.00111495	23.7527	23.1749
rs79981033	A	G	A	G	0.12745	-0.069753	0.0487796	0.0497107	0.035544	0.028695	8.98049e-06	21282	0.000926088	19.7254	23.1749
rs80051818	C	T	C	T	-0.046612	0.00872914	0.353187	0.580489	0.0157945	0.010326	6.39588e-06	21282	0.00095654	20.3747	23.1749
rs949221	A	C	A	C	-0.61656	0.441427	0.000903011	0.0831649	0.254776	0.13711	6.93585e-06	21282	0.000949265	20.2196	23.1749
rs10270752	C	T	C	T	0.04694	0.0366363	0.486702	0.0172155	0.01538	0.0099716	2.52522e-06	20860	0.00106116	22.1572	26.7742
rs10930505	C	T	C	T	0.061053	0.0238417	0.775997	0.191325	0.0182462	0.011757	2.08882e-07	20860	0.00129106	26.9637	26.7742
rs111516487	A	G	A	G	0.1908	0.0718023	0.017462	0.213055	0.0576629	0.040488	2.4615e-06	20860	0.00106348	22.2056	26.7742
rs115785649	G	T	G	T	-0.21992	-0.00821515	0.0223493	0.87375	0.0517012	0.049708	9.72523e-06	20860	0.000937465	19.572	26.7742
rs11898718	T	C	T	C	-0.052914	-0.0311464	0.278288	0.065432	0.0169063	0.011051	1.69395e-06	20860	0.00109786	22.9243	26.7742
rs12347640	G	A	G	A	0.16392	0.120665	0.0219139	0.0199297	0.0518392	0.036781	8.36566e-06	20860	0.000951238	19.8598	26.7742
rs13025681	C	T	C	T	-0.059923	-0.0244482	0.781856	0.180712	0.0182645	0.011862	4.4157e-07	20860	0.00122187	25.517	26.7742
rs145198105	C	T	C	T	0.18087	0.0234095	0.0173626	0.685256	0.0577584	0.038834	3.22181e-06	20860	0.00103883	21.6904	26.7742
rs1833890	A	G	A	G	-0.38302	-0.0732864	0.02995	0.101327	0.044729	0.073023	1.57616e-07	20860	0.00131715	27.5095	26.7742
rs1847037	C	T	C	T	-0.053267	0.0321536	0.72205	0.0574844	0.0169264	0.010768	7.60501e-07	20860	0.00117172	24.4684	26.7742
rs1877034	G	A	G	A	0.052307	0.0121276	0.322827	0.453192	0.0161678	0.0098247	1.02565e-07	20860	0.00135699	28.3426	26.7742
rs193159223	T	C	T	C	-0.18782	-0.150176	0.00689936	0.109413	0.093811	0.040936	4.49883e-06	20860	0.00100814	21.049	26.7742
rs2267161	T	C	T	C	-0.065865	-0.00629054	0.328955	0.694554	0.0160194	0.010631	5.92243e-10	20860	0.00183674	38.3813	26.7742
rs2361625	G	C	G	C	0.044732	0.000683893	0.334268	0.966104	0.0160933	0.0097155	4.16677e-06	20860	0.0010152	21.1965	26.7742
rs2441109	A	G	A	G	0.06243	0.013431	0.877309	0.558078	0.0229316	0.013884	6.94544e-06	20860	0.000968328	20.217	26.7742
rs2617280	A	C	A	C	-0.051288	0.012024	0.490855	0.425344	0.0150831	0.010155	4.44222e-07	20860	0.00122131	25.5053	26.7742
rs2785246	C	T	C	T	-0.069526	0.01385	0.655363	0.385764	0.0159686	0.011774	3.58014e-09	20860	0.00166881	34.8662	26.7742
rs2854334	G	A	G	A	0.045479	-0.0166819	0.599786	0.27913	0.0154138	0.010076	6.40177e-06	20860	0.00097568	20.3706	26.7742
rs33599	G	A	G	A	0.073524	0.00860003	0.700431	0.600974	0.0164436	0.011139	4.18794e-11	20860	0.00208423	43.5636	26.7742
rs34404554	G	C	G	C	0.067384	0.0115963	0.173082	0.564536	0.0201284	0.013857	1.166e-06	20860	0.00113232	23.6447	26.7742
rs35032408	G	T	G	T	0.055669	-0.0190633	0.186498	0.325571	0.0193916	0.011948	3.19448e-06	20860	0.00103961	21.7067	26.7742
rs35064996	G	A	G	A	0.045557	0.00993457	0.637104	0.528625	0.0157665	0.0098718	3.95731e-06	20860	0.00101991	21.2949	26.7742
rs36450	G	A	G	A	0.046653	0.0260606	0.500016	0.0836546	0.0150651	0.0098709	2.30144e-06	20860	0.00106971	22.3359	26.7742
rs374499153	C	T	C	T	-0.070645	-0.0677277	0.0155053	0.326096	0.0689687	0.015678	6.64202e-06	20860	0.000972399	20.3021	26.7742
rs3752534	A	G	A	G	0.047468	-0.00173044	0.485636	0.909133	0.0151617	0.010055	2.36211e-06	20860	0.00106723	22.2842	26.7742
rs3795736	C	T	C	T	-0.049161	-0.0272386	0.211534	0.141836	0.0185424	0.010747	4.80286e-06	20860	0.00100211	20.9231	26.7742
rs4150197	T	C	T	C	-0.051832	-0.0172884	0.317886	0.284269	0.0161457	0.0112	3.7145e-06	20860	0.00102565	21.415	26.7742
rs4307773	C	T	C	T	-0.046738	-0.00573587	0.615252	0.710719	0.0154652	0.0099302	2.53454e-06	20860	0.00106084	22.1505	26.7742
rs4686844	A	G	A	G	0.046816	-0.00504233	0.537771	0.739707	0.0151767	0.010052	3.22107e-06	20860	0.00103877	21.6891	26.7742
rs4773142	G	A	G	A	0.046919	0.00943245	0.715979	0.57229	0.016704	0.010421	6.75616e-06	20860	0.000970829	20.2692	26.7742
rs4890830	G	T	G	T	0.05539	-0.000707126	0.827114	0.971756	0.0199722	0.011927	3.43479e-06	20860	0.00103285	21.5655	26.7742
rs4933381	C	T	C	T	-0.057697	-0.00026514	0.175548	0.989289	0.0197507	0.012238	2.43669e-06	20860	0.00106441	22.2251	26.7742
rs4978767	T	C	T	C	-0.053281	0.00325908	0.40881	0.831754	0.0153403	0.01016	1.58307e-07	20860	0.00131665	27.4989	26.7742
rs55705857	G	A	G	A	0.10308	0.0118712	0.0964196	0.643302	0.0256349	0.021521	1.68229e-06	20860	0.00109858	22.9394	26.7742
rs56147303	T	C	T	C	0.063517	-0.0108664	0.168863	0.58926	0.0201264	0.014233	8.14142e-06	20860	0.000953802	19.9134	26.7742
rs56929051	C	G	C	G	-0.099362	0.036865	0.0260776	0.443212	0.0480777	0.022042	6.58264e-06	20860	0.000973199	20.3188	26.7742
rs59749576	T	C	T	C	-0.082724	-0.00433503	0.0931829	0.867598	0.0260034	0.015356	7.24269e-08	20860	0.00138928	29.0178	26.7742
rs60802522	G	A	G	A	0.076828	0.0196676	0.116881	0.404884	0.0236125	0.015383	5.95662e-07	20860	0.00119433	24.9411	26.7742
rs61145484	G	C	G	C	-0.12917	-0.0185702	0.029286	0.680519	0.0450999	0.029093	9.05107e-06	20860	0.000944108	19.7108	26.7742
rs61863293	G	A	G	A	-0.050762	-0.00650774	0.681904	0.690418	0.0163393	0.010738	2.2914e-06	20860	0.00107017	22.3454	26.7742
rs625448	T	A	T	A	0.048979	0.00219245	0.568314	0.885208	0.0151862	0.0097244	4.77639e-07	20860	0.00121465	25.366	26.7742
rs648044	G	A	G	A	-0.045402	-0.00381827	0.499525	0.802672	0.0152798	0.010186	8.33681e-06	20860	0.000951513	19.8656	26.7742
rs6490238	C	T	C	T	-0.049646	0.0125544	0.245576	0.476041	0.0176157	0.010946	5.77431e-06	20860	0.000985179	20.5691	26.7742
rs6491921	A	T	A	T	-0.057987	0.0210247	0.170852	0.294028	0.0200364	0.011457	4.19856e-07	20860	0.00122651	25.614	26.7742
rs6554068	A	G	A	G	0.052346	0.0399245	0.712714	0.0163817	0.0166332	0.010073	2.04833e-07	20860	0.00129292	27.0027	26.7742
rs667684	A	C	A	C	-0.14996	-0.0512782	0.987749	0.456765	0.0689053	0.03214	3.09386e-06	20860	0.00104254	21.7679	26.7742
rs6693950	G	A	G	A	0.050169	0.0270126	0.265269	0.113766	0.0170805	0.010505	1.80468e-06	20860	0.00109217	22.8054	26.7742
rs67827860	T	C	T	C	0.17485	0.0234355	0.262277	0.171064	0.0171213	0.012291	1.03992e-45	20860	0.00960837	202.356	26.7742
rs6786712	G	A	G	A	0.045043	-0.00636043	0.325097	0.693921	0.0161621	0.01016	9.3261e-06	20860	0.000941334	19.6529	26.7742
rs6953397	C	T	C	T	-0.060786	-0.0222178	0.553899	0.145318	0.0152567	0.010085	1.69512e-09	20860	0.00173854	36.3257	26.7742
rs73115282	T	A	T	A	0.086296	-0.0159182	0.0908362	0.548583	0.0265354	0.019471	9.38642e-06	20860	0.000940766	19.641	26.7742
rs73155733	C	T	C	T	-0.18914	-0.00157174	0.0190076	0.977662	0.0561331	0.039612	1.81134e-06	20860	0.00109175	22.7967	26.7742
rs7565313	G	A	G	A	0.064183	0.0225237	0.333258	0.159294	0.0160032	0.012166	1.33537e-07	20860	0.00133245	27.8293	26.7742
rs762392	T	C	T	C	-0.05249	0.00840336	0.779297	0.644232	0.0181974	0.011434	4.44631e-06	20860	0.00100926	21.0725	26.7742
rs76587534	G	A	G	A	0.12117	-0.0453279	0.013659	0.487713	0.0653186	0.024626	8.70763e-07	20860	0.00115927	24.2081	26.7742
rs7688521	T	C	T	C	0.057197	-0.0227112	0.125354	0.317474	0.0227189	0.012212	2.83857e-06	20860	0.00105051	21.9347	26.7742
rs9436132	C	T	C	T	0.047213	-0.00138382	0.262156	0.935783	0.0171751	0.010292	4.51856e-06	20860	0.00100779	21.0418	26.7742
rs9911006	G	A	G	A	0.049771	0.0088856	0.365717	0.571013	0.0156834	0.01001	6.67268e-07	20860	0.00118374	24.7197	26.7742
rs9919775	C	G	C	G	0.072909	-0.00615078	0.463879	0.686189	0.0152235	0.016198	6.7936e-06	20860	0.000970295	20.2581	26.7742
rs10898217	G	C	G	C	-0.066972	0.050077	0.182837	0.00948768	0.0193052	0.014932	7.33162e-06	20860	0.000963424	20.1145	24.7923
rs10962596	G	C	G	C	-0.061483	0.00439204	0.735916	0.797639	0.0171294	0.011654	1.33537e-07	20860	0.0013325	27.8303	24.7923
rs114216871	T	C	T	C	0.12571	-0.0275355	0.0366943	0.493818	0.0402419	0.026469	2.05636e-06	20860	0.00108014	22.554	24.7923
rs117352321	A	G	A	G	0.20957	-0.0490918	0.00426632	0.67751	0.118048	0.046927	8.01493e-06	20860	0.000955176	19.9421	24.7923
rs11787684	C	T	C	T	-0.057823	-0.0274828	0.299304	0.0963141	0.0165261	0.011916	1.228e-06	20860	0.00112755	23.545	24.7923
rs118144405	A	C	A	C	0.17425	0.00234429	0.0084774	0.977473	0.0830211	0.035667	1.0392e-06	20860	0.00114288	23.8655	24.7923
rs1198078	T	C	T	C	0.052235	0.00348342	0.320231	0.829383	0.0161649	0.011383	4.48332e-06	20860	0.00100846	21.0556	24.7923
rs12737914	A	G	A	G	-0.1072	0.0411096	0.0662445	0.176085	0.0303861	0.023899	7.31139e-06	20860	0.000963601	20.1182	24.7923
rs1293467	G	C	G	C	0.068921	0.00528119	0.553377	0.727674	0.0151662	0.0099034	3.52371e-12	20860	0.0023164	48.4276	24.7923
rs12991088	T	G	T	G	0.046244	-0.0223343	0.227899	0.213588	0.0179571	0.010278	6.85173e-06	20860	0.000969523	20.2419	24.7923
rs13040845	C	T	C	T	0.22843	-0.0542418	0.0144905	0.399863	0.0644305	0.042885	1.01181e-07	20860	0.00135828	28.3696	24.7923
rs13112702	T	G	T	G	-0.04442	0.0140425	0.541612	0.353483	0.0151344	0.0098216	6.14045e-06	20860	0.000979609	20.4527	24.7923
rs140755734	T	C	T	C	-0.14584	0.117302	0.0187036	0.0362518	0.0560159	0.027495	1.14262e-07	20860	0.00134693	28.1322	24.7923
rs16953385	G	A	G	A	-0.12271	0.0809476	0.0157464	0.184707	0.0610279	0.027658	9.18544e-06	20860	0.000942745	19.6823	24.7923
rs17248895	C	A	C	A	-0.0807	-0.00800838	0.132528	0.718816	0.022243	0.016281	7.22104e-07	20860	0.00117641	24.5665	24.7923
rs2327389	C	T	C	T	-0.076134	-0.00139599	0.911185	0.958375	0.0267469	0.016041	2.08593e-06	20860	0.00107873	22.5244	24.7923
rs2454282	A	C	A	C	0.055786	-0.00197984	0.770756	0.91199	0.0179124	0.011709	1.9081e-06	20860	0.00108699	22.697	24.7923
rs2504072	C	G	C	G	-0.057853	0.00713092	0.743174	0.679415	0.0172553	0.010646	5.5616e-08	20860	0.00141368	29.5282	24.7923
rs2952559	C	G	C	G	0.071898	-0.0274543	0.125945	0.227067	0.022728	0.012911	2.59537e-08	20860	0.00148441	31.0079	24.7923
rs3095861	G	C	G	C	-0.052314	0.00301117	0.252845	0.861983	0.0173204	0.011694	7.73215e-06	20860	0.000958471	20.011	24.7923
rs3134049	G	T	G	T	-0.051886	0.0100528	0.479627	0.50535	0.0150921	0.0098933	1.58198e-07	20860	0.00131684	27.5028	24.7923
rs35075092	G	A	G	A	-0.05335	-0.000180751	0.23187	0.991936	0.0178837	0.011243	2.09942e-06	20860	0.00107826	22.5145	24.7923
rs35761271	A	G	A	G	0.10316	0.0574412	0.0229877	0.257444	0.0507228	0.022986	7.22437e-06	20860	0.000964634	20.1398	24.7923
rs4770259	A	C	A	C	0.093042	-0.00540878	0.0595486	0.867017	0.0323011	0.01772	1.53038e-07	20860	0.00131991	27.567	24.7923
rs55945818	A	G	A	G	-0.049878	0.00369243	0.49981	0.807259	0.0151351	0.0099477	5.37527e-07	20860	0.00120375	25.138	24.7923
rs62533253	T	C	T	C	-0.18125	0.109803	0.00513283	0.299992	0.105941	0.037061	1.01251e-06	20860	0.00114528	23.9155	24.7923
rs6487661	A	G	A	G	-0.064789	0.0250779	0.264843	0.141435	0.0170544	0.012499	2.19533e-07	20860	0.00128641	26.8665	24.7923
rs7179769	A	C	A	C	-0.12014	0.00763001	0.0530083	0.820663	0.0336579	0.026936	8.23379e-06	20860	0.000952754	19.8915	24.7923
rs7185012	A	T	A	T	-0.050155	-0.0160576	0.666862	0.316125	0.0160183	0.010605	2.26517e-06	20860	0.00107109	22.3648	24.7923
rs7321115	G	A	G	A	0.054488	-0.00892668	0.636385	0.569706	0.0157026	0.0099538	4.44939e-08	20860	0.00143445	29.9628	24.7923
rs73330617	G	A	G	A	-0.059267	0.0253732	0.125662	0.263776	0.0227051	0.012758	3.41114e-06	20860	0.00103347	21.5784	24.7923
rs75175592	G	T	G	T	0.1678	-0.0493578	0.00511824	0.644794	0.107065	0.034863	1.49658e-06	20860	0.00110932	23.164	24.7923
rs76559921	A	G	A	G	0.39902	-0.0536252	0.0127077	0.426586	0.0674491	0.087271	4.854e-06	20860	0.00100115	20.903	24.7923
rs9471130	C	T	C	T	0.056949	-0.0436235	0.227559	0.0155382	0.0180293	0.011501	7.41481e-07	20860	0.00117402	24.5166	24.7923
rs9491697	G	A	G	A	-0.06003	0.0300275	0.446934	0.047642	0.0151612	0.0098632	1.17598e-09	20860	0.00177262	37.039	24.7923
rs11926554	C	T	C	T	-0.060553	-0.0234961	0.234965	0.186219	0.0177752	0.01216	6.41505e-07	21081	0.0011749	24.7949	21.642
rs140529475	T	A	T	A	-0.18427	-0.085686	0.0108994	0.236704	0.0724148	0.038981	2.29034e-06	21081	0.00105889	22.3441	21.642
rs141232046	T	C	T	C	0.19317	-0.0528958	0.0125037	0.448535	0.0697963	0.042921	6.8124e-06	21081	0.000959912	20.2534	21.642
rs146397328	GA	G	GA	G	-0.08197	-0.0008466	0.058404	0.978942	0.0320741	0.016751	9.9793e-07	21081	0.0011346	23.9435	21.642
rs149306053	A	C	A	C	0.12319	0.0746689	0.0284455	0.102258	0.0456969	0.02709	5.45632e-06	21081	0.000979977	20.6772	21.642
rs16907456	G	A	G	A	-0.17938	-0.0457111	0.0187	0.412675	0.0557999	0.040509	9.55652e-06	21081	0.000929287	19.6067	21.642
rs17100365	A	G	A	G	0.16297	0.0519459	0.00679461	0.566872	0.090709	0.036683	8.92689e-06	21081	0.00093538	19.7353	21.642
rs206798	T	C	T	C	0.05965	0.0390296	0.132902	0.0791334	0.0222298	0.012633	2.35234e-06	21081	0.00105647	22.2929	21.642
rs2367491	C	A	C	A	-0.0442	-0.0330663	0.541776	0.0291139	0.0151545	0.009798	6.48485e-06	21081	0.000964405	20.3483	21.642
rs62475408	C	A	C	A	0.077248	0.0469108	0.116447	0.0467154	0.0235866	0.015604	7.45247e-07	21081	0.0011612	24.5054	21.642
rs72849623	G	A	G	A	0.1645	0.0350628	0.00682806	0.699428	0.0908146	0.036229	5.63897e-06	21081	0.00097702	20.6147	21.642
rs77385797	G	C	G	C	0.093385	0.0754996	0.0625953	0.0157156	0.0312569	0.020176	3.70681e-06	21081	0.0010152	21.4212	21.642
rs77565989	G	C	G	C	0.19789	0.063087	0.0134552	0.344604	0.066751	0.043092	4.41266e-06	21081	0.000999376	21.0869	21.642
rs9296213	G	C	G	C	0.048789	0.0130256	0.646252	0.411482	0.01586	0.010555	3.81593e-06	21081	0.0010125	21.3642	21.642
rs1021767	A	T	A	T	0.11389	0.0688615	0.0641779	0.0248725	0.0306954	0.021607	1.37025e-07	21081	0.00131619	27.7806	21.8321
rs10747291	C	A	C	A	0.04713	-0.00348324	0.5088	0.822624	0.0155383	0.010244	4.23448e-06	21081	0.00100306	21.1648	21.8321
rs111986715	G	A	G	A	0.14949	-0.0143509	0.0383833	0.71696	0.0395859	0.032142	3.32277e-06	21081	0.00102504	21.629	21.8321
rs112732792	A	G	A	G	0.14718	0.0374722	0.0212787	0.476905	0.0526821	0.033255	9.65162e-06	21081	0.000928302	19.5859	21.8321
rs114173002	G	C	G	C	-0.21705	-0.0347145	0.0283188	0.449776	0.0459315	0.048857	8.93923e-06	21081	0.000935338	19.7344	21.8321
rs114969830	C	T	C	T	0.064159	0.0528782	0.121804	0.0213983	0.0229817	0.013918	4.05135e-06	21081	0.00100701	21.2481	21.8321
rs13054467	A	G	A	G	0.047716	-0.00748641	0.329248	0.641786	0.0160927	0.010074	2.18776e-06	21081	0.00106309	22.4328	21.8321
rs149224184	G	C	G	C	-0.22797	0.0844043	0.00103238	0.725869	0.240724	0.051534	9.7499e-06	21081	0.000927414	19.5671	21.8321
rs150462089	T	A	T	A	0.21304	-0.0897967	0.00142619	0.672723	0.21258	0.046284	4.19083e-06	21081	0.001004	21.1846	21.8321
rs1533932	C	A	C	A	-0.064669	-0.0454004	0.121318	0.0490422	0.0230667	0.014195	5.24928e-06	21081	0.000983565	20.753	21.8321
rs180765886	A	G	A	G	-0.1603	-0.0357901	0.029258	0.428868	0.0452393	0.036214	9.63163e-06	21081	0.00092858	19.5917	21.8321
rs189981470	C	T	C	T	0.23504	0.0366782	0.0290272	0.41768	0.0452564	0.049892	2.48199e-06	21081	0.00105166	22.1912	21.8321
rs190710294	A	G	A	G	-0.21938	0.0410368	0.0139721	0.531976	0.0656596	0.049343	8.79427e-06	21081	0.000936795	19.7652	21.8321
rs33945132	A	G	A	G	-0.045256	-0.0232975	0.372443	0.134903	0.0155832	0.010156	8.39653e-06	21081	0.000941037	19.8548	21.8321
rs55641732	G	A	G	A	-0.16053	-0.0886014	0.0110618	0.217966	0.0719194	0.036201	9.28325e-06	21081	0.000931913	19.6621	21.8321
rs62439186	G	T	G	T	0.077519	0.0199357	0.0454636	0.581739	0.0361911	0.017438	8.81455e-06	21081	0.000936537	19.7598	21.8321
rs718665	G	A	G	A	0.23432	0.001144	0.996566	0.993011	0.130606	0.051966	6.54636e-06	21081	0.000963541	20.3301	21.8321
rs73607872	T	C	T	C	0.17678	0.078204	0.0064002	0.415488	0.0960412	0.039517	7.73571e-06	21081	0.000948408	20.0105	21.8321
rs75958097	G	A	G	A	0.15041	0.0546678	0.00526375	0.593204	0.102336	0.031963	2.54449e-06	21081	0.00104933	22.142	21.8321
rs76555860	G	T	G	T	0.10007	0.0144619	0.355686	0.358258	0.0157418	0.017484	1.05657e-08	21081	0.00155153	32.7556	21.8321
rs77499442	T	C	T	C	-0.097233	-0.00749179	0.123734	0.743495	0.0228947	0.021908	9.11801e-06	21081	0.000933523	19.6961	21.8321
rs78441297	A	T	A	T	0.10567	-0.00399686	0.0616043	0.898829	0.0314366	0.022544	2.78227e-06	21081	0.00104111	21.9685	21.8321
rs79076831	T	C	T	C	-0.088251	-0.0381947	0.0907421	0.146033	0.0262743	0.018391	1.60768e-06	21081	0.0010911	23.0243	21.8321
rs79588479	T	C	T	C	-0.10919	-0.0329934	0.0801875	0.241434	0.0281655	0.023832	4.64301e-06	21081	0.000994767	20.9896	21.8321
rs8040832	A	G	A	G	-0.069484	-0.00996959	0.148512	0.643418	0.021536	0.013834	5.13689e-07	21081	0.00119526	25.2251	21.8321
rs9920843	C	A	C	A	0.3428	0.0344724	0.0030385	0.800717	0.136568	0.067765	4.25696e-07	21081	0.00121242	25.5876	21.8321
rs111964306	G	C	G	C	0.12756	-0.0925399	0.0432294	0.0143054	0.037779	0.023751	7.93049e-08	21081	0.00136641	28.8419	22.0164
rs11646670	T	G	T	G	-0.063564	0.0223494	0.203998	0.232562	0.0187215	0.013093	1.21339e-06	21081	0.00111678	23.5669	22.0164
rs11812535	G	C	G	C	0.049	-0.0135588	0.327041	0.406691	0.0163412	0.010686	4.55932e-06	21081	0.000996409	21.0243	22.0164
rs12413153	G	T	G	T	0.08212	-0.0125228	0.107458	0.606717	0.0243272	0.016852	1.10688e-06	21081	0.00112516	23.744	22.0164
rs12589066	C	T	C	T	-0.14089	0.0144609	0.0423611	0.699882	0.0375142	0.031433	7.42677e-06	21081	0.000952103	20.0885	22.0164
rs12628141	C	T	C	T	0.05441	-0.00504789	0.266635	0.767526	0.017076	0.011461	2.07348e-06	21081	0.00106797	22.5357	22.0164
rs13076083	A	G	A	G	0.10319	0.000926284	0.0540805	0.978258	0.0339877	0.019243	8.29278e-08	21081	0.00136222	28.7534	22.0164
rs13140168	C	T	C	T	0.081288	-0.00909476	0.0986039	0.720722	0.0254403	0.017073	1.93821e-06	21081	0.00107418	22.6669	22.0164
rs137982428	G	T	G	T	-0.17443	0.0130207	0.0207492	0.806254	0.0530891	0.039112	8.24328e-06	21081	0.000942587	19.8875	22.0164
rs147626470	T	C	T	C	-0.20862	0.126915	0.0166164	0.0321026	0.0592194	0.044097	2.24905e-06	21081	0.00106058	22.3796	22.0164
rs17049105	G	A	G	A	0.08703	-0.00744089	0.152523	0.722926	0.0209868	0.018342	2.10136e-06	21081	0.00106682	22.5114	22.0164
rs181388048	G	C	G	C	0.094177	0.0294408	0.0512319	0.391924	0.0343882	0.021185	8.81252e-06	21081	0.000936558	19.7602	22.0164
rs367216	C	A	C	A	0.068625	-0.0195944	0.146101	0.374085	0.0220447	0.014948	4.4412e-06	21081	0.000998788	21.0745	22.0164
rs4293017	A	G	A	G	0.048526	-0.0280973	0.372283	0.0722387	0.0156304	0.010467	3.56944e-06	21081	0.00101852	21.4913	22.0164
rs61878714	A	G	A	G	-0.13321	0.0262961	0.0415667	0.491066	0.0381869	0.027986	1.95119e-06	21081	0.00107358	22.6543	22.0164
rs72643592	G	A	G	A	-0.057717	0.0208894	0.122459	0.367238	0.0231678	0.012812	6.6696e-06	21081	0.000961755	20.2924	22.0164
rs72713693	C	G	C	G	0.055221	-0.0140308	0.147407	0.511121	0.0213528	0.012484	9.75888e-06	21081	0.000927271	19.5641	22.0164
rs7793297	T	C	T	C	0.047746	0.0225367	0.251277	0.194681	0.0173779	0.010578	6.4003e-06	21081	0.000965509	20.3716	22.0164
rs79304384	A	T	A	T	0.09408	-0.0432603	0.105273	0.0782042	0.0245629	0.020452	4.25011e-06	21081	0.00100276	21.1584	22.0164
rs904989	T	C	T	C	-0.047851	0.0226331	0.374868	0.155754	0.0159444	0.010697	7.73749e-06	21081	0.00094832	20.0086	22.0164
rs921561	G	A	G	A	0.045139	-0.0296572	0.529232	0.0503257	0.015153	0.0097652	3.81505e-06	21081	0.00101254	21.3649	22.0164
rs9405356	C	T	C	T	0.047465	0.013205	0.328589	0.41199	0.0160958	0.0099987	2.07683e-06	21081	0.00106784	22.533	22.0164
rs988189	T	C	T	C	0.051883	-0.0262409	0.19206	0.175698	0.0193786	0.011571	7.37055e-06	21081	0.000952803	20.1033	22.0164
Table S1.The SNP of MR on PERIPHVERTIGO
rs111964306	G	C	G	C	0.12756	-0.0925399	0.0432294	0.0143054	0.037779	0.023751	7.93049e-08	21081	0.00136641	28.8419	22.0164
rs11646670	T	G	T	G	-0.063564	0.0223494	0.203998	0.232562	0.0187215	0.013093	1.21339e-06	21081	0.00111678	23.5669	22.0164
rs11812535	G	C	G	C	0.049	-0.0135588	0.327041	0.406691	0.0163412	0.010686	4.55932e-06	21081	0.000996409	21.0243	22.0164
rs12413153	G	T	G	T	0.08212	-0.0125228	0.107458	0.606717	0.0243272	0.016852	1.10688e-06	21081	0.00112516	23.744	22.0164
rs12589066	C	T	C	T	-0.14089	0.0144609	0.0423611	0.699882	0.0375142	0.031433	7.42677e-06	21081	0.000952103	20.0885	22.0164
rs12628141	C	T	C	T	0.05441	-0.00504789	0.266635	0.767526	0.017076	0.011461	2.07348e-06	21081	0.00106797	22.5357	22.0164
rs13076083	A	G	A	G	0.10319	0.000926284	0.0540805	0.978258	0.0339877	0.019243	8.29278e-08	21081	0.00136222	28.7534	22.0164
rs13140168	C	T	C	T	0.081288	-0.00909476	0.0986039	0.720722	0.0254403	0.017073	1.93821e-06	21081	0.00107418	22.6669	22.0164
rs137982428	G	T	G	T	-0.17443	0.0130207	0.0207492	0.806254	0.0530891	0.039112	8.24328e-06	21081	0.000942587	19.8875	22.0164
rs147626470	T	C	T	C	-0.20862	0.126915	0.0166164	0.0321026	0.0592194	0.044097	2.24905e-06	21081	0.00106058	22.3796	22.0164
rs17049105	G	A	G	A	0.08703	-0.00744089	0.152523	0.722926	0.0209868	0.018342	2.10136e-06	21081	0.00106682	22.5114	22.0164
rs181388048	G	C	G	C	0.094177	0.0294408	0.0512319	0.391924	0.0343882	0.021185	8.81252e-06	21081	0.000936558	19.7602	22.0164
rs367216	C	A	C	A	0.068625	-0.0195944	0.146101	0.374085	0.0220447	0.014948	4.4412e-06	21081	0.000998788	21.0745	22.0164
rs4293017	A	G	A	G	0.048526	-0.0280973	0.372283	0.0722387	0.0156304	0.010467	3.56944e-06	21081	0.00101852	21.4913	22.0164
rs61878714	A	G	A	G	-0.13321	0.0262961	0.0415667	0.491066	0.0381869	0.027986	1.95119e-06	21081	0.00107358	22.6543	22.0164
rs72643592	G	A	G	A	-0.057717	0.0208894	0.122459	0.367238	0.0231678	0.012812	6.6696e-06	21081	0.000961755	20.2924	22.0164
rs72713693	C	G	C	G	0.055221	-0.0140308	0.147407	0.511121	0.0213528	0.012484	9.75888e-06	21081	0.000927271	19.5641	22.0164
rs7793297	T	C	T	C	0.047746	0.0225367	0.251277	0.194681	0.0173779	0.010578	6.4003e-06	21081	0.000965509	20.3716	22.0164
rs79304384	A	T	A	T	0.09408	-0.0432603	0.105273	0.0782042	0.0245629	0.020452	4.25011e-06	21081	0.00100276	21.1584	22.0164
rs904989	T	C	T	C	-0.047851	0.0226331	0.374868	0.155754	0.0159444	0.010697	7.73749e-06	21081	0.00094832	20.0086	22.0164
rs921561	G	A	G	A	0.045139	-0.0296572	0.529232	0.0503257	0.015153	0.0097652	3.81505e-06	21081	0.00101254	21.3649	22.0164
rs9405356	C	T	C	T	0.047465	0.013205	0.328589	0.41199	0.0160958	0.0099987	2.07683e-06	21081	0.00106784	22.533	22.0164
rs988189	T	C	T	C	0.051883	-0.0262409	0.19206	0.175698	0.0193786	0.011571	7.37055e-06	21081	0.000952803	20.1033	22.0164
Table S1.The SNP of MR on VERTIGO
SNP	effect_allele.exposure	other_allele.exposure	effect_allele.outcome	other_allele.outcome	beta.exposure	beta.outcome	eaf.outcome	pval.outcome	se.outcome	se.exposure	pval.exposure	samplesize.exposure	R2	f	meanf
rs10148294	T	A	T	A	0.057785	0.0190401	0.452795	0.0981138	0.011511	0.0098808	5.04429e-09	20860	0.00163689	34.1983	23.7467
rs11245522	C	T	C	T	0.05162	-0.0118976	0.238214	0.373962	0.0133819	0.011252	4.50505e-06	20860	0.00100792	21.0443	23.7467
rs114500668	A	G	A	G	-0.0815	-0.0532246	0.0890163	0.00909746	0.0204053	0.017653	3.92193e-06	20860	0.00102075	21.3126	23.7467
rs117385564	G	A	G	A	0.20759	0.0183875	0.00824315	0.771523	0.0633219	0.042163	8.56841e-07	20860	0.00116073	24.2386	23.7467
rs12262057	G	A	G	A	-0.12048	0.00704092	0.0260167	0.844517	0.0359013	0.026909	7.59801e-06	20860	0.000960071	20.0444	23.7467
rs12605657	A	G	A	G	-0.049084	0.018869	0.32038	0.12373	0.0122581	0.010267	1.75711e-06	20860	0.00109447	22.8534	23.7467
rs12928520	T	C	T	C	-0.046751	0.00888953	0.363218	0.455826	0.0119205	0.0099621	2.71082e-06	20860	0.00105465	22.0211	23.7467
rs137989777	A	C	A	C	0.22055	0.05391	0.0225727	0.161212	0.0384795	0.045865	1.52933e-06	20860	0.00110728	23.1212	23.7467
rs138153354	T	C	T	C	0.45774	0.0170962	0.00233656	0.88898	0.12247	0.10255	8.10774e-06	20860	0.000954196	19.9216	23.7467
rs143218239	T	A	T	A	0.081569	0.0323747	0.099214	0.0931558	0.0192823	0.018201	7.45247e-06	20860	0.000961895	20.0825	23.7467
rs1447691	G	A	G	A	0.049448	0.0210244	0.702987	0.0916453	0.0124642	0.01022	1.31856e-06	20860	0.00112097	23.4074	23.7467
rs149165144	A	G	A	G	-0.12762	0.00161891	0.0255232	0.964458	0.0363313	0.02737	3.14123e-06	20860	0.00104117	21.7393	23.7467
rs1494821	A	T	A	T	-0.051058	-0.00177435	0.290503	0.887807	0.0125769	0.010334	7.84332e-07	20860	0.00116888	24.4089	23.7467
rs149957936	A	G	A	G	0.074513	0.0057284	0.262268	0.665678	0.0132575	0.014405	2.32756e-07	20860	0.00128105	26.7544	23.7467
rs150434736	T	C	T	C	0.055374	0.00885873	0.420648	0.442534	0.011536	0.010534	1.48081e-07	20860	0.00132293	27.6302	23.7467
rs16917281	G	A	G	A	-0.051834	-0.000839891	0.217959	0.951612	0.0138406	0.011561	7.37904e-06	20860	0.000962733	20.1	23.7467
rs175194	A	G	A	G	-0.04643	0.0172927	0.51581	0.130135	0.0114251	0.010033	3.71963e-06	20860	0.00102559	21.4138	23.7467
rs192588843	T	G	T	G	0.19448	-0.00422057	0.0141123	0.931598	0.0491712	0.040436	1.523e-06	20860	0.00110769	23.1298	23.7467
rs2458503	C	A	C	A	0.04525	-0.00771756	0.581529	0.503903	0.011547	0.010098	7.45933e-06	20860	0.000961688	20.0782	23.7467
rs2472496	A	G	A	G	-0.046501	0.00548302	0.631078	0.643701	0.0118544	0.0098877	2.58167e-06	20860	0.00105915	22.1153	23.7467
rs2507849	C	T	C	T	0.048719	0.016511	0.716278	0.191404	0.0126382	0.01024	1.97197e-06	20860	0.00108396	22.6337	23.7467
rs2636773	G	C	G	C	-0.046998	-0.020959	0.687775	0.088873	0.0123188	0.010429	6.63285e-06	20860	0.000972605	20.3063	23.7467
rs268269	A	C	A	C	-0.043935	-0.0178049	0.632014	0.131558	0.011807	0.0099008	9.14534e-06	20860	0.000943098	19.6897	23.7467
rs2863994	G	T	G	T	0.044058	0.0160535	0.433242	0.164111	0.0115378	0.0098567	7.86683e-06	20860	0.000956878	19.9777	23.7467
rs34427856	AAC	A	AAC	A	-0.0462	0.00101356	0.619929	0.931148	0.0117309	0.010148	5.33089e-06	20860	0.000992607	20.7244	23.7467
rs3780256	A	G	A	G	0.052288	0.00678077	0.55248	0.555794	0.0115104	0.0108	1.29628e-06	20860	0.00112242	23.4377	23.7467
rs4308324	T	A	T	A	0.049032	0.00867816	0.420628	0.451873	0.0115356	0.010198	1.53532e-06	20860	0.00110696	23.1147	23.7467
rs4452638	A	G	A	G	0.063146	-0.0247986	0.0743631	0.254097	0.0217445	0.014141	8.02786e-06	20860	0.000954997	19.9384	23.7467
rs4624605	T	G	T	G	0.049085	0.00867816	0.420628	0.451873	0.0115356	0.010195	1.48662e-06	20860	0.00111001	23.1783	23.7467
rs4661077	C	T	C	T	-0.047263	-0.00377281	0.358194	0.750914	0.0118853	0.010207	3.67282e-06	20860	0.0010268	21.439	23.7467
rs6073581	T	C	T	C	0.053992	0.0214523	0.397191	0.0658734	0.0116634	0.010868	6.8124e-07	20860	0.00118177	24.6785	23.7467
rs62298088	T	C	T	C	0.061072	0.0113996	0.217215	0.411932	0.0138935	0.012668	1.43979e-06	20860	0.00111294	23.2395	23.7467
rs718227	A	T	A	T	0.051621	0.00498132	0.301169	0.689042	0.0124485	0.011176	3.87972e-06	20860	0.0010217	21.3323	23.7467
rs72653549	A	G	A	G	-0.10707	0.00482485	0.0730127	0.8274	0.0221285	0.017044	3.40879e-10	20860	0.00188824	39.4594	23.7467
rs72729584	A	G	A	G	-0.1356	-0.00158284	0.0314147	0.961973	0.0331987	0.029635	4.77639e-06	20860	0.00100267	20.9348	23.7467
rs72932557	T	A	T	A	0.086913	0.0579009	0.113104	0.00107488	0.0177059	0.014622	2.82553e-09	20860	0.00169086	35.3276	23.7467
rs7504673	T	C	T	C	0.049484	0.00390889	0.307518	0.75154	0.0123461	0.01103	7.28786e-06	20860	0.00096393	20.125	23.7467
rs7580171	T	C	T	C	-0.051995	0.0260151	0.215602	0.0604951	0.0138587	0.01136	4.74024e-06	20860	0.00100327	20.9471	23.7467
rs77649636	A	G	A	G	0.092651	0.043282	0.0389757	0.141349	0.0294278	0.018516	5.66239e-07	20860	0.00119887	25.036	23.7467
rs7827735	T	C	T	C	-0.071409	-0.0380214	0.132204	0.0236663	0.016805	0.015442	3.78181e-06	20860	0.00102409	21.3824	23.7467
rs9291437	C	G	C	G	0.045154	0.0163694	0.385997	0.162256	0.0117131	0.010106	7.93414e-06	20860	0.000956102	19.9615	23.7467
rs9321054	A	G	A	G	0.051938	0.0101521	0.50801	0.372926	0.011394	0.0098779	1.47028e-07	20860	0.00132358	27.6439	23.7467
rs9818394	C	A	C	A	-0.072606	-0.0188187	0.304547	0.128772	0.0123891	0.010592	7.32825e-12	20860	0.00224749	46.9837	23.7467
rs10827226	C	T	C	T	-0.063762	0.000464229	0.916109	0.982096	0.0206861	0.014199	7.14003e-06	21081	0.000955657	20.1636	21.4508
rs116266882	A	G	A	G	0.116	-0.0372021	0.0556596	0.137921	0.0250759	0.026056	8.55067e-06	21081	0.000939293	19.818	21.4508
rs12607202	A	G	A	G	-0.062275	0.0163746	0.309123	0.19231	0.0125594	0.01199	2.08018e-07	21081	0.00127803	26.9742	21.4508
rs143853998	C	G	C	G	-0.17589	-0.0050971	0.00500372	0.949736	0.080857	0.039405	8.10214e-06	21081	0.000944231	19.9223	21.4508
rs148330780	T	G	T	G	-0.22779	-0.0158154	0.00349864	0.872727	0.0987254	0.046943	1.228e-06	21081	0.00111571	23.5443	21.4508
rs150628107	C	A	C	A	-0.27494	0.0302005	0.0470271	0.2635	0.0270092	0.059564	3.93822e-06	21081	0.00100967	21.3043	21.4508
rs1806195	G	T	G	T	-0.04956	0.0208393	0.578573	0.0710362	0.0115437	0.009782	4.0879e-07	21081	0.00121615	25.6665	21.4508
rs2504780	A	T	A	T	0.074609	-0.017315	0.143074	0.288713	0.0163203	0.016519	6.3183e-06	21081	0.000966727	20.3973	21.4508
rs28377011	C	T	C	T	0.081685	-0.0186273	0.0829997	0.367571	0.0206733	0.018175	7.01132e-06	21081	0.000957257	20.1974	21.4508
rs4689553	T	A	T	A	-0.078366	-0.0137412	0.0861766	0.498757	0.0203138	0.016842	3.2923e-06	21081	0.00102596	21.6485	21.4508
rs58716618	A	G	A	G	0.13086	-0.0759091	0.0164791	0.0976517	0.0458294	0.027884	2.7077e-06	21081	0.00104366	22.0223	21.4508
rs62187620	A	G	A	G	0.069755	-0.0113484	0.111182	0.537771	0.0184171	0.015515	6.96627e-06	21081	0.000957943	20.2118	21.4508
rs62247799	T	C	T	C	-0.069671	0.0156369	0.07111	0.480967	0.022188	0.014666	2.04033e-06	21081	0.00106936	22.5652	21.4508
rs7029011	T	C	T	C	-0.067989	0.0133721	0.900098	0.481748	0.0190081	0.015275	8.59014e-06	21081	0.000938892	19.8095	21.4508
rs7154859	T	G	T	G	0.093843	-0.0111503	0.0970613	0.565096	0.019382	0.021234	9.94031e-06	21081	0.00092565	19.5299	21.4508
rs72763088	T	A	T	A	0.047266	-0.0181256	0.55682	0.118775	0.0116195	0.010225	3.8089e-06	21081	0.0010126	21.3663	21.4508
rs73033416	C	T	C	T	-0.1967	0.0285123	0.0319888	0.380717	0.0325269	0.043734	6.90717e-06	21081	0.000958656	20.2269	21.4508
rs74504504	T	C	T	C	0.21533	-0.0211789	0.00865056	0.733905	0.0623029	0.046631	3.90391e-06	21081	0.00101048	21.3215	21.4508
rs74903589	T	C	T	C	0.13686	0.0203879	0.0127735	0.69143	0.051366	0.029953	4.92493e-06	21081	0.000989353	20.8752	21.4508
rs11067788	G	A	G	A	0.098435	0.0486619	0.0305039	0.141462	0.0330951	0.022159	8.9454e-06	21081	0.000935193	19.7314	20.7979
rs138034760	T	C	T	C	-0.22001	-0.100877	0.0105527	0.0728568	0.0562386	0.048307	5.28324e-06	21081	0.000982984	20.7407	20.7979
rs142668107	A	G	A	G	0.16818	0.0762296	0.0335537	0.0166667	0.0318422	0.036168	3.33964e-06	21081	0.00102462	21.6201	20.7979
rs149801468	C	T	C	T	-0.22792	0.043942	0.00939901	0.460168	0.0594959	0.049403	3.98199e-06	21081	0.00100862	21.2822	20.7979
rs174652	T	C	T	C	-0.046847	-0.0280923	0.624963	0.0175416	0.0118276	0.010283	5.25291e-06	21081	0.00098357	20.7531	20.7979
rs183228268	A	C	A	C	0.24908	-0.0156432	0.00900495	0.798677	0.0613316	0.053649	3.4578e-06	21081	0.00102146	21.5533	20.7979
rs1907795	T	A	T	A	-0.044745	-0.0117492	0.360627	0.322365	0.0118725	0.010014	7.93049e-06	21081	0.000946175	19.9633	20.7979
rs6090230	T	C	T	C	-0.089884	-0.0646048	0.023915	0.0848731	0.0374936	0.020123	7.98362e-06	21081	0.000945534	19.9498	20.7979
rs72776553	A	G	A	G	-0.059942	-0.00640974	0.186335	0.662206	0.014672	0.013219	5.8023e-06	21081	0.00097443	20.56	20.7979
rs76687863	T	C	T	C	-0.17004	-0.0431259	0.0144173	0.372432	0.0483514	0.037266	5.07224e-06	21081	0.000986635	20.8178	20.7979
rs78718627	T	A	T	A	-0.15854	-0.0302905	0.00812178	0.637161	0.0642196	0.033261	1.88669e-06	21081	0.00107658	22.7178	20.7979
rs79145082	T	C	T	C	-0.1619	-0.0432152	0.0203365	0.287482	0.0406287	0.036304	8.25658e-06	21081	0.000942506	19.8858	20.7979
Table S1.The SNP of MR on VERTIGOCENT
SNP	effect_allele.exposure	other_allele.exposure	effect_allele.outcome	other_allele.outcome	beta.exposure	beta.outcome	eaf.outcome	pval.outcome	se.outcome	se.exposure	pval.exposure	samplesize.exposure	R2	f	meanf
rs10113458	A	G	A	G	-0.071556	0.043965	0.0831713	0.718454	0.121947	0.014436	7.2277e-07	21282	0.00115315	24.5673	22.699
rs10760291	C	T	C	T	-0.050228	0.0129581	0.377904	0.856251	0.0715325	0.011025	5.24324e-06	21282	0.000974314	20.7536	22.699
rs10973426	T	A	T	A	0.050681	0.060729	0.213799	0.471042	0.084254	0.010815	2.79834e-06	21282	0.00103081	21.9582	22.699
rs11204021	T	C	T	C	0.058448	0.20335	0.127754	0.0517059	0.104519	0.01317	9.12011e-06	21282	0.000924599	19.6937	22.699
rs11646341	T	C	T	C	-0.043191	0.148695	0.461597	0.0325162	0.0695486	0.0096499	7.65244e-06	21282	0.000940416	20.0309	22.699
rs11771644	C	G	C	G	0.045891	0.00662289	0.402605	0.925344	0.0706788	0.0097513	2.54039e-06	21282	0.0010396	22.1457	22.699
rs11851911	C	T	C	T	-0.046941	-0.103298	0.339595	0.158567	0.0732661	0.010603	9.59622e-06	21282	0.0009201	19.5978	22.699
rs12508031	T	A	T	A	0.061493	0.0472469	0.322247	0.533759	0.0759257	0.010649	7.81988e-09	21282	0.00156438	33.3421	22.699
rs13107325	T	C	T	C	0.091386	-0.151502	0.0140127	0.590491	0.281536	0.01901	1.53993e-06	21282	0.0010847	23.1076	22.699
rs146830778	A	G	A	G	-0.32953	0.138172	0.00525212	0.768684	0.46982	0.074076	8.69161e-06	21282	0.000929007	19.7876	22.699
rs146950389	G	A	G	A	0.16373	0.768821	0.00778361	0.0103467	0.29985	0.035722	4.59939e-06	21282	0.000986152	21.006	22.699
rs17055929	T	C	T	C	-0.12942	-0.193005	0.0121412	0.542846	0.317175	0.028056	3.99117e-06	21282	0.00099886	21.277	22.699
rs1915117	C	T	C	T	-0.045864	0.0297348	0.260427	0.706651	0.0790068	0.010349	9.40156e-06	21282	0.000922007	19.6384	22.699
rs2252032	C	T	C	T	-0.054885	-0.102958	0.499317	0.137206	0.0692726	0.0097755	1.99618e-08	21282	0.00147902	31.5202	22.699
rs2381426	C	A	C	A	0.048012	-0.008448	0.741851	0.914942	0.0790957	0.010369	3.67536e-06	21282	0.00100641	21.438	22.699
rs2805306	C	T	C	T	0.062161	0.103112	0.734391	0.193863	0.0793633	0.013118	2.16621e-06	21282	0.00105398	22.4523	22.699
rs2818218	A	G	A	G	0.048987	0.0651173	0.372803	0.362734	0.0715442	0.0099089	7.72147e-07	21282	0.0011471	24.4382	22.699
rs4383117	T	C	T	C	0.05303	0.074911	0.682793	0.313	0.0742468	0.010055	1.3471e-07	21282	0.00130527	27.8124	22.699
rs4664044	G	T	G	T	-0.053992	-0.106952	0.773357	0.198397	0.0831575	0.012087	7.9726e-06	21282	0.000936704	19.9517	22.699
rs4767469	T	C	T	C	-0.059308	-0.109017	0.821032	0.228291	0.0904874	0.012783	3.51399e-06	21282	0.00101044	21.5239	22.699
rs548367	A	G	A	G	-0.045635	-0.0951097	0.41863	0.178559	0.0707028	0.009942	4.45656e-06	21282	0.000989023	21.0672	22.699
rs56017741	C	T	C	T	0.055347	0.101795	0.217708	0.228055	0.0844505	0.011504	1.51078e-06	21282	0.00108644	23.1446	22.699
rs58538575	C	T	C	T	0.067087	0.186408	0.153035	0.0550136	0.09715	0.015063	8.48203e-06	21282	0.000931187	19.8341	22.699
rs62365019	C	T	C	T	0.15098	-0.407699	0.025209	0.0642392	0.220317	0.032534	3.49301e-06	21282	0.00101091	21.5339	22.699
rs62481981	A	G	A	G	0.20284	-0.245009	0.00363036	0.660494	0.557814	0.04408	4.21502e-06	21282	0.000993985	21.173	22.699
rs6699195	C	T	C	T	-0.047877	-0.153756	0.519733	0.0266404	0.069361	0.0097027	8.09841e-07	21282	0.00114277	24.346	22.699
rs6741887	C	T	C	T	-0.045837	-0.0105548	0.325215	0.886952	0.0742452	0.010201	7.05505e-06	21282	0.000947813	20.1886	22.699
rs7280602	G	C	G	C	-0.049373	0.0056905	0.25139	0.943728	0.0806188	0.011005	7.28786e-06	21282	0.000944878	20.126	22.699
rs73313052	A	G	A	G	-0.083867	-0.150538	0.148544	0.120213	0.0968789	0.014817	1.53109e-08	21282	0.00150313	32.0347	22.699
rs73709589	C	T	C	T	-0.098605	-0.0998243	0.121509	0.3575	0.108488	0.022147	8.5369e-06	21282	0.000930575	19.8211	22.699
rs76514671	A	G	A	G	0.073194	-0.0390125	0.0921813	0.740265	0.117684	0.01545	2.17921e-06	21282	0.00105347	22.4416	22.699
rs7719591	T	C	T	C	0.049996	0.0885759	0.227456	0.28294	0.082493	0.011197	8.03526e-06	21282	0.00093594	19.9355	22.699
rs7851057	T	A	T	A	-0.056409	-0.0509568	0.708804	0.504653	0.0763756	0.010462	7.05505e-08	21282	0.00136415	29.0688	22.699
rs801109	T	C	T	C	0.052409	0.0569414	0.272401	0.467069	0.0782963	0.011086	2.2877e-06	21282	0.00104904	22.3471	22.699
rs975360	C	T	C	T	-0.045598	0.0660053	0.442953	0.346108	0.0700571	0.0098659	3.82825e-06	21282	0.0010027	21.3588	22.699
rs10076423	C	T	C	T	-0.13184	0.00693709	0.0517441	0.964734	0.156901	0.026746	8.30807e-07	21281	0.00114048	24.2961	23.068
rs10260018	A	G	A	G	0.045801	-0.0823983	0.629089	0.250206	0.07166	0.010053	5.23962e-06	21281	0.000974413	20.7548	23.068
rs10498754	A	T	A	T	0.078658	0.0359332	0.0776677	0.781613	0.129622	0.017698	8.85931e-06	21281	0.000927347	19.7513	23.068
rs107068	G	A	G	A	0.045493	0.00032801	0.494665	0.996217	0.0691745	0.0096954	2.71894e-06	21281	0.00103351	22.0149	23.068
rs10918996	C	T	C	T	-0.043635	0.0701792	0.375761	0.325732	0.0714114	0.0098054	8.62581e-06	21281	0.000929701	19.8015	23.068
rs116105213	C	T	C	T	0.24529	-0.17659	0.0234423	0.433222	0.225332	0.05276	3.35274e-06	21281	0.00101465	21.6127	23.068
rs11724787	A	C	A	C	0.093771	-0.270955	0.0596893	0.0688494	0.148925	0.021207	9.84238e-06	21281	0.000917884	19.5496	23.068
rs117741334	A	G	A	G	0.13561	0.0049173	0.0288471	0.980578	0.201995	0.030041	6.39146e-06	21281	0.000956637	20.3758	23.068
rs12504963	G	A	G	A	0.060852	-0.104261	0.139545	0.295974	0.0997617	0.013361	5.2808e-06	21281	0.000973771	20.7411	23.068
rs13107325	T	C	T	C	-0.14476	-0.151502	0.0140127	0.590491	0.281536	0.018994	2.61818e-14	21281	0.002722	58.0796	23.068
rs150324687	AC	A	AC	A	-0.15436	0.13837	0.0144777	0.619126	0.27836	0.033511	4.12192e-06	21281	0.000996024	21.2155	23.068
rs150447086	ATCT	A	ATCT	A	-0.20057	0.0911658	0.00663476	0.818911	0.398199	0.043176	3.4135e-06	21281	0.00101301	21.5778	23.068
rs150888939	C	A	C	A	-0.28407	0.292996	0.0111171	0.398463	0.347	0.055291	2.80543e-07	21281	0.00123883	26.3937	23.068
rs17544884	A	T	A	T	0.072141	-0.158213	0.138336	0.117402	0.101045	0.016081	7.29625e-06	21281	0.000944791	20.1232	23.068
rs181655878	T	C	T	C	0.15334	-0.0477125	0.0147948	0.863762	0.278065	0.033704	5.39883e-06	21281	0.000971704	20.697	23.068
rs1884709	G	A	G	A	0.054542	-0.0569785	0.753501	0.475998	0.0799412	0.010969	6.66807e-07	21281	0.00116046	24.7222	23.068
rs201171318	GC	G	GC	G	-0.11552	-0.0293964	0.0213097	0.901573	0.237691	0.025717	7.09251e-06	21281	0.000947262	20.1759	23.068
rs2199041	A	G	A	G	0.071939	0.00980182	0.108724	0.92892	0.109882	0.014438	6.32412e-07	21281	0.00116524	24.8241	23.068
rs2431301	T	C	T	C	-0.19483	0.260175	0.0627607	0.0734024	0.145323	0.040153	1.23027e-06	21281	0.0011051	23.5415	23.068
rs309556	C	T	C	T	-0.082454	0.0499953	0.115445	0.641028	0.107226	0.018018	4.76212e-06	21281	0.000983085	20.9397	23.068
rs34854637	G	A	G	A	-0.054	0.161055	0.233328	0.0488326	0.0817516	0.011571	3.07822e-06	21281	0.00102237	21.7773	23.068
rs3733573	C	T	C	T	-0.05065	-0.0512855	0.312165	0.491688	0.0745834	0.010755	2.49747e-06	21281	0.0010411	22.1767	23.068
rs5752560	C	T	C	T	-0.092223	0.0880264	0.0425375	0.603501	0.169486	0.020419	6.31975e-06	21281	0.000957638	20.3971	23.068
rs6442409	C	T	C	T	-0.055845	-0.0456255	0.592224	0.520101	0.0709364	0.010233	4.88765e-08	21281	0.00139754	29.7798	23.068
rs6484839	A	G	A	G	0.049038	-0.179397	0.452858	0.00857808	0.0682526	0.009921	7.75711e-07	21281	0.00114674	24.4295	23.068
rs6503187	G	C	G	C	0.05477	-0.0214577	0.751356	0.788123	0.0798427	0.011226	1.07572e-06	21281	0.00111727	23.801	23.068
rs6993670	G	A	G	A	0.046854	0.038508	0.699597	0.609178	0.0753217	0.0098689	2.07109e-06	21281	0.00105804	22.538	23.068
rs7117877	C	T	C	T	-0.053921	0.0955739	0.329813	0.193734	0.0735403	0.010894	7.50067e-07	21281	0.00114987	24.4963	23.068
rs72671990	A	G	A	G	-0.10935	-0.147427	0.0344879	0.445844	0.193382	0.022817	1.65615e-06	21281	0.0010781	22.9657	23.068
rs73010977	A	C	A	C	-0.059474	0.170761	0.246592	0.0413962	0.0837256	0.012966	4.52481e-06	21281	0.000987691	21.0379	23.068
rs73190699	C	A	C	A	-0.12213	-0.0310316	0.0458981	0.853125	0.167618	0.027582	9.55873e-06	21281	0.000920452	19.6043	23.068
rs7554272	G	A	G	A	-0.053178	0.0992923	0.277556	0.195684	0.0767361	0.011023	1.41579e-06	21281	0.00109244	23.2715	23.068
rs7774145	T	G	T	G	0.044487	0.0439391	0.543068	0.529236	0.0698362	0.0099533	7.87771e-06	21281	0.000937848	19.9752	23.068
rs79696701	G	C	G	C	0.099444	-0.15895	0.085278	0.201445	0.124428	0.022438	9.38426e-06	21281	0.000922139	19.6403	23.068
rs7970967	A	G	A	G	0.077319	-0.203354	0.0974466	0.0887565	0.11948	0.016346	2.25632e-06	21281	0.00105027	22.3722	23.068
rs9990927	G	C	G	C	0.044734	-0.00703752	0.529305	0.919843	0.0699331	0.0097617	4.61743e-06	21281	0.000985835	20.9983	23.068
rs10193792	A	G	A	G	-0.057523	0.0209345	0.198352	0.809341	0.0867657	0.011343	3.98658e-07	21081	0.00121845	25.715	22.0443
rs11233957	C	T	C	T	0.10048	0.0927193	0.0231162	0.667793	0.216039	0.020471	9.24911e-07	21081	0.00114155	24.0902	22.0443
rs1189159	A	G	A	G	0.047602	-0.0193677	0.533376	0.780412	0.0694726	0.0098117	1.23367e-06	21081	0.00111529	23.5354	22.0443
rs139216303	A	T	A	T	-0.21005	1.17152	0.00377031	0.026942	0.529534	0.045044	3.1304e-06	21081	0.00103046	21.7435	22.0443
rs146387994	C	A	C	A	0.19217	0.227848	0.00907825	0.513719	0.348894	0.039906	1.47809e-06	21081	0.00109882	23.1875	22.0443
rs146446580	G	A	G	A	-0.17122	0.518983	0.00167493	0.518736	0.804257	0.037736	5.72928e-06	21081	0.000975623	20.5852	22.0443
rs148675833	C	G	C	G	-0.22114	-0.257977	0.00549186	0.558127	0.440515	0.047269	2.91072e-06	21081	0.00103715	21.8847	22.0443
rs149610606	T	C	T	C	-0.14256	0.4274	0.0266453	0.0399632	0.208068	0.031303	5.28932e-06	21081	0.000982891	20.7387	22.0443
rs28642986	G	C	G	C	0.046267	-0.0131708	0.290418	0.862438	0.0760123	0.0099695	3.4906e-06	21081	0.00102061	21.5355	22.0443
rs4147823	C	A	C	A	-0.053634	-0.000584379	0.22218	0.994414	0.0834638	0.011991	7.76605e-06	21081	0.000948127	20.0045	22.0443
rs4772287	G	A	G	A	-0.054662	0.0617456	0.68222	0.412134	0.0752861	0.011617	2.54918e-06	21081	0.00104915	22.1382	22.0443
rs58283601	T	C	T	C	0.12193	-0.0830753	0.0404417	0.641729	0.178548	0.025713	2.12961e-06	21081	0.00106552	22.484	22.0443
rs60316402	T	C	T	C	0.06404	-0.146275	0.173882	0.110779	0.0917258	0.013796	3.47376e-06	21081	0.00102108	21.5454	22.0443
rs6099292	G	A	G	A	0.056107	-0.0811851	0.822167	0.375387	0.0915867	0.012196	4.24131e-06	21081	0.00100293	21.1621	22.0443
rs62211616	A	G	A	G	0.060477	-0.0892816	0.112551	0.4215	0.111072	0.012641	1.72942e-06	21081	0.00108456	22.8863	22.0443
rs6960721	T	C	T	C	0.046769	-0.0771257	0.639647	0.282965	0.0718328	0.01022	4.76431e-06	21081	0.000992412	20.9398	22.0443
rs7126393	A	G	A	G	0.060883	-0.0609069	0.266434	0.440359	0.0789373	0.012573	1.29122e-06	21081	0.00111107	23.4462	22.0443
rs7176313	A	T	A	T	-0.04471	0.0488051	0.395712	0.492187	0.071058	0.0098191	5.30884e-06	21081	0.000982535	20.7312	22.0443
rs76007728	T	C	T	C	0.084484	-0.237733	0.0308571	0.229472	0.197827	0.01829	3.87525e-06	21081	0.00101109	21.3344	22.0443
rs770267	G	A	G	A	0.060079	-0.217896	0.83159	0.0110375	0.0857347	0.013048	4.15911e-06	21081	0.00100468	21.199	22.0443
